# Supplementary material
Source: publisher figshare collection journal article supplement (https://springernature.figshare.com/ndownloader/files/17484425)
Supplement: Supplementary file [file 17484425]

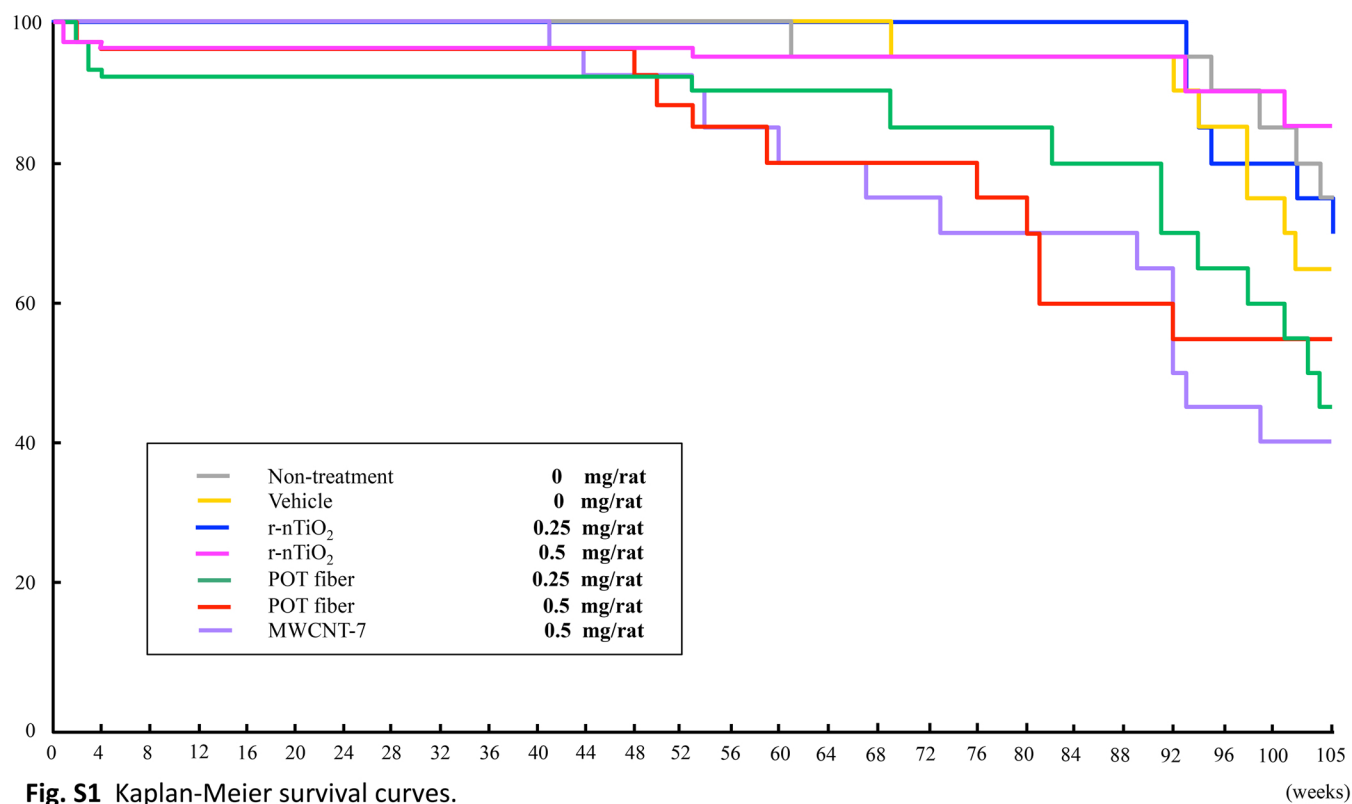

**Fig. S1** Kaplan-Meier survival curves.

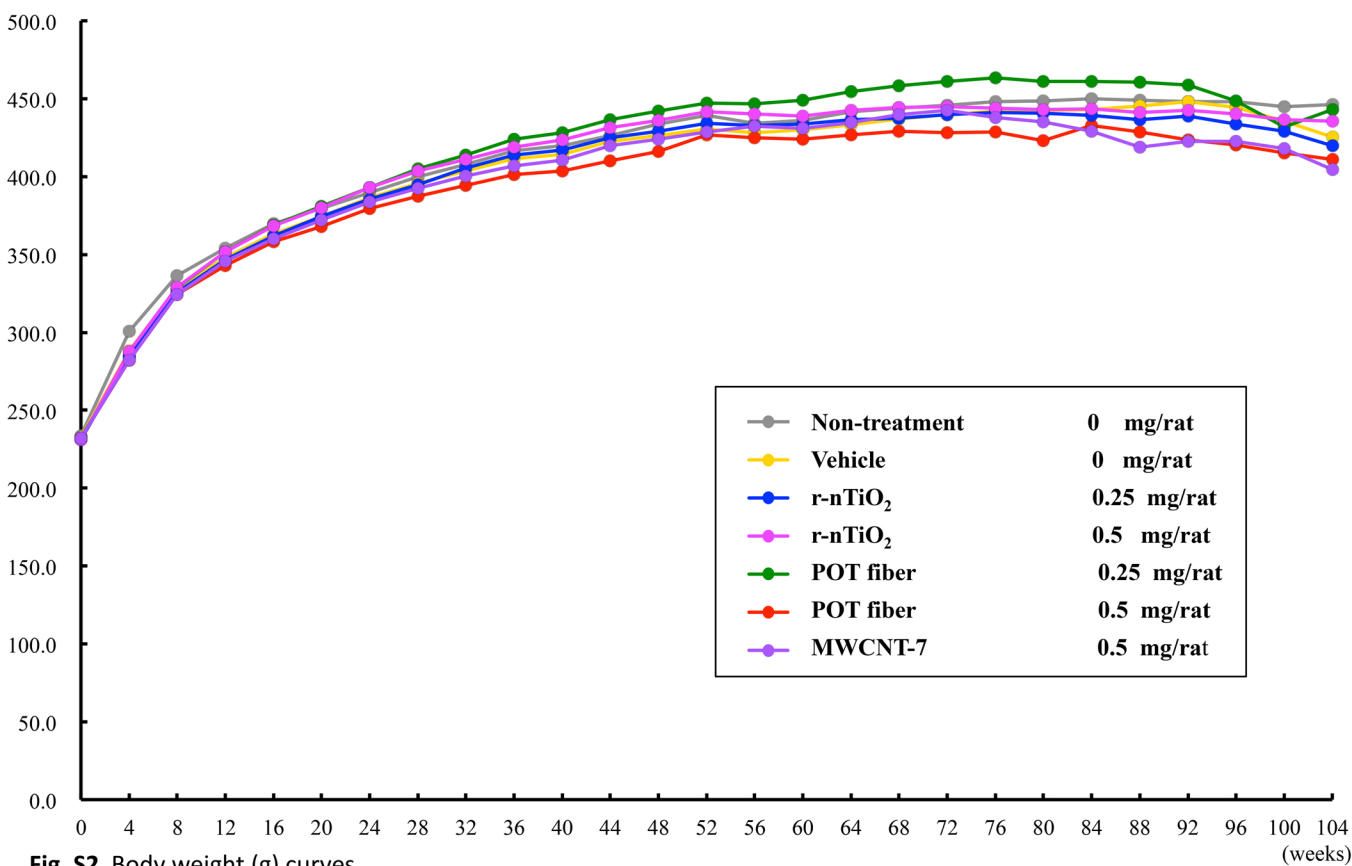

**Fig. S2** Body weight (g) curves.

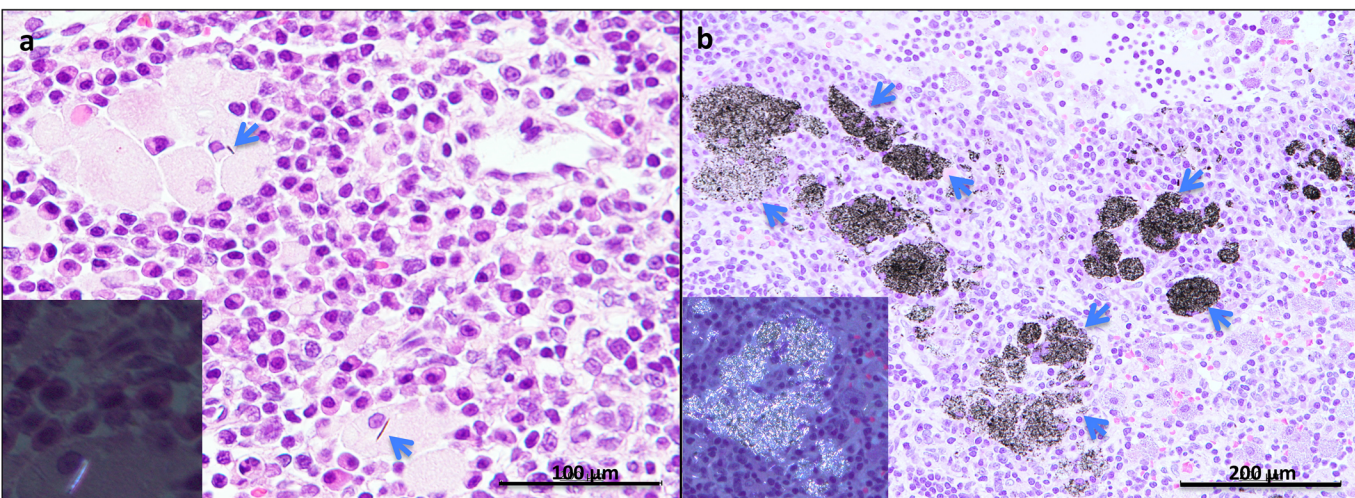

**Fig. S3** Mediastinal lymph nodes of rats treated with POT fibers (a) and MWCNT-7 (b).

**Figure S1.** Kaplan-Meier survival plots of untreated and vehicle control rats and rats treated with 0.25 mg r-nTiO<sub>2</sub>, 0.50 mg r-nTiO<sub>2</sub>, 0.25 mg POT fibers, 0.50 mg POT fibers, and 0.50 mg MWCNT-7. The MWCNT-7 treated rats had a significant reduction in survival rate (40%) compared to the vehicle control group ( $p < 0.05$ ).

**Figure S2.** Body weight curves of untreated and vehicle control rats and rats treated with 0.25 mg r-nTiO<sub>2</sub>, 0.50 mg r-nTiO<sub>2</sub>, 0.25 mg POT fibers, 0.50 mg POT fibers, and 0.50 mg MWCNT-7. There was no growth retardation in the rats administered r-nTiO<sub>2</sub>, POT fibers, or 0.50 MWCNT-7 compared to the vehicle control group.

**Figure S3.** Mediastinal lymph nodes of rats treated with POT fibers (a) and MWCNT-7 (b). The amount of fibers (blue arrows) translocated into the mediastinal lymph nodes in MWCNT-7 treated rats was obviously higher than in the POT fiber treated rats. Insert, polarized light microscopic image.
